# Supplementary material for: Effect of solvent and additives on the open-circuit voltage of ZnO-based dye-sensitized solar cells: a combined theoretical and experimental study
Source: Royal Society of Chemistry journal article supplement (doi:10.1039/c004358c), 2010-01-01

### Supporting Information

**Table S1.** Main Structural parameters (distance in Å and angles in degrees) computed for the adsorbate molecules adsorbed on ZnO or in the gas phase (vac). For labeling scheme refer to Figure SI.1

|                                      | <b>MP/ZnO</b> | <b>MP/vac</b> |                                      | <b>MeCN/ZnO</b> | <b>MeCN/vac</b> |
|--------------------------------------|---------------|---------------|--------------------------------------|-----------------|-----------------|
| d(N-C <sub>1</sub> )                 | 1.342         | 1.335         | d(C <sub>1</sub> -C <sub>2</sub> )   | 1.444           | 1.456           |
| d(C <sub>1</sub> -C <sub>2</sub> )   | 1.387         | 1.389         | d(C <sub>2</sub> -N)                 | 1.157           | 1.157           |
| d(C <sub>3</sub> -C <sub>4</sub> )   | 1.505         | 1.505         | d(C <sub>1</sub> -H <sub>1</sub> )   | 1.115           | 1.095           |
| d(N-Zn <sub>1</sub> )                | 2.113         | -             | d(H <sub>1</sub> -O <sub>1</sub> )   | 2.007           | -               |
| d(H <sub>1</sub> -O <sub>1</sub> )   | 2.061         | -             | d(N-Zn <sub>1</sub> )                | 2.165           | -               |
| d(H <sub>2</sub> -O <sub>2</sub> )   | 2.283         | -             | a(C <sub>1</sub> -C <sub>2</sub> -N) | 176.34          | 180             |
| d(C <sub>1</sub> -H <sub>1</sub> )   | 1.098         | 1.092         |                                      |                 |                 |
|                                      | <b>NM/ZnO</b> | <b>NM/vac</b> |                                      | <b>DMF/ZnO</b>  | <b>DMF/vac</b>  |
| d(C-N)                               | 1.478         | 1.492         | d(C <sub>1</sub> -O <sub>3</sub> )   | 1.236           | 1.213           |
| d(C-H <sub>1</sub> )                 | 1.095         | 1.090         | d(C <sub>1</sub> -N)                 | 1.331           | 1.359           |
| d(C-H <sub>2</sub> )                 | 1.095         | 1.090         | d(C <sub>2</sub> -N)                 | 1.460           | 1.447           |
| d(N-O <sub>1</sub> )                 | 1.224         | 1.218         | d(C <sub>2</sub> -H <sub>1</sub> )   | 1.099           | 1.092           |
| d(N-O <sub>2</sub> )                 | 1.223         | 1.218         | d(C <sub>2</sub> -H <sub>2</sub> )   | 1.101           | 1.099           |
| d(O <sub>1</sub> -Zn <sub>1</sub> )  | 2.277         | -             | d(O <sub>3</sub> -Zn <sub>1</sub> )  | 2.074           | -               |
| d(O <sub>2</sub> -Zn <sub>2</sub> )  | 2.284         | -             | d(H <sub>1</sub> -O <sub>1</sub> )   | 2.146           | -               |
| d(H <sub>1</sub> -O <sub>3</sub> )   | 2.230         | -             | d(H <sub>2</sub> -O <sub>2</sub> )   | 2.203           | -               |
| d(H <sub>2</sub> -O <sub>4</sub> )   | 2.227         | -             | a(O <sub>3</sub> -C <sub>1</sub> -N) | 124.74          | 125.61          |
| a(O <sub>1</sub> -N-O <sub>2</sub> ) | 123.45        | 125.70        |                                      |                 |                 |

**Figure S1.** Structure and labeling scheme for NM, MeCN, DMF, MP and TBP (from left to right).

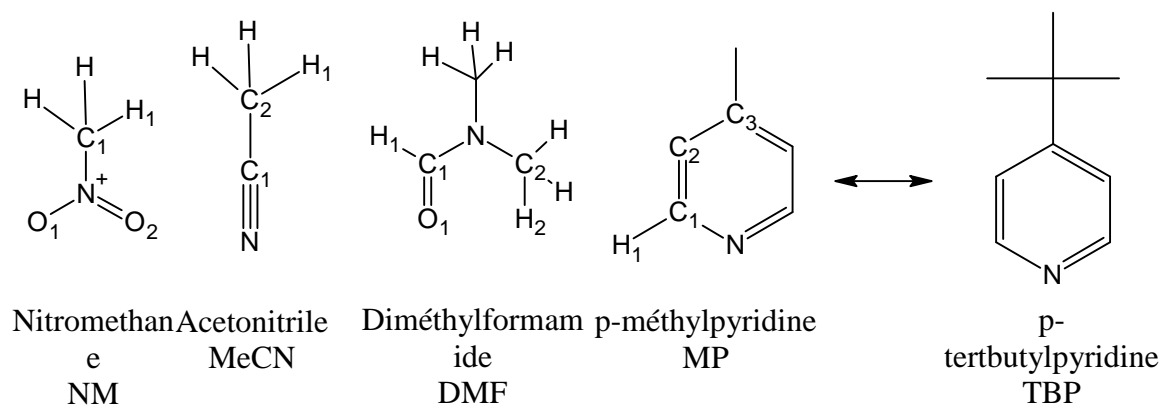

**Figure S2.** Basic representation of a hexagonal cell and of its plane (100) together with the directions [100], [001] and [120] and the  $a$  and  $b$  parameters.

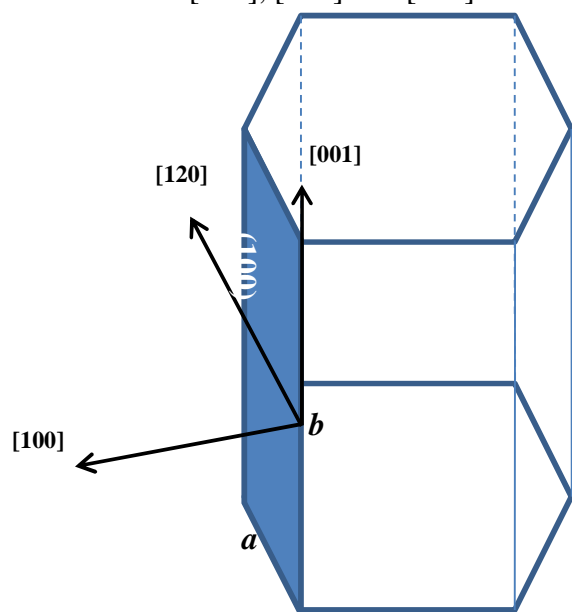

Supplement: c004358c.pdf [file c004358c.pdf]
